# Supplementary material for: Recovery of Rare Earth Elements from Ion-Adsorption Deposits Using Electrokinetic Technology: The Soil Conductivity Mechanism Study
Source: MDPI journal article supplement (doi:10.3390/min14050491), 2024-05-07
Supplement: s1 [file s1]

# Recovery of Rare Earth Elements from Ion-Adsorption Deposits Using Electrokinetic Technology: The Soil Conductivity Mechanism Study

Shichang Kang<sup>1,2,3</sup>, Bowen Ling<sup>4,5</sup>, Xiaoliang Liang<sup>1,2,3</sup>, Gaofeng Wang<sup>1,2,3,\*</sup>, Jie Xu<sup>1,2,3</sup>, Yongjin Xu<sup>1,2,3</sup>, Runliang Zhu<sup>1,2,3</sup>, Jingming Wei<sup>1,2,3</sup>, Jianxi Zhu<sup>1,2,3</sup> and Hongping He<sup>1,2,3</sup>

<sup>1</sup> CAS Key Laboratory of Mineralogy and Metallogeny/Guangdong Provincial Key Laboratory of Mineral Physics and Material, Guangzhou Institute of Geochemistry, Chinese Academy of Sciences, Guangzhou 510640, China; kangshichang@gig.ac.cn (S.K.); liangxl@gig.ac.cn (X.L.); xujie777@gig.ac.cn (J.X.); xuyongjin@gig.ac.cn (Y.X.); zhurl@gig.ac.cn (R.Z.); weijm@gig.ac.cn (J.W.); zhujx@gig.ac.cn (J.Z.); hehp@gig.ac.cn (H.H.)

<sup>2</sup> CAS Center for Excellence in Deep Earth Science, Guangzhou 510640, China

<sup>3</sup> University of Chinese Academy of Sciences, Beijing 100049, China

<sup>4</sup> Institute of Mechanics, Chinese Academy of Sciences, Beijing 100190, China; lingbowen@imech.ac.cn

<sup>5</sup> School of Engineering Science, University of Chinese Academy of Sciences, Beijing 100049, China

\* Correspondence: wanggaofeng@gig.ac.cn

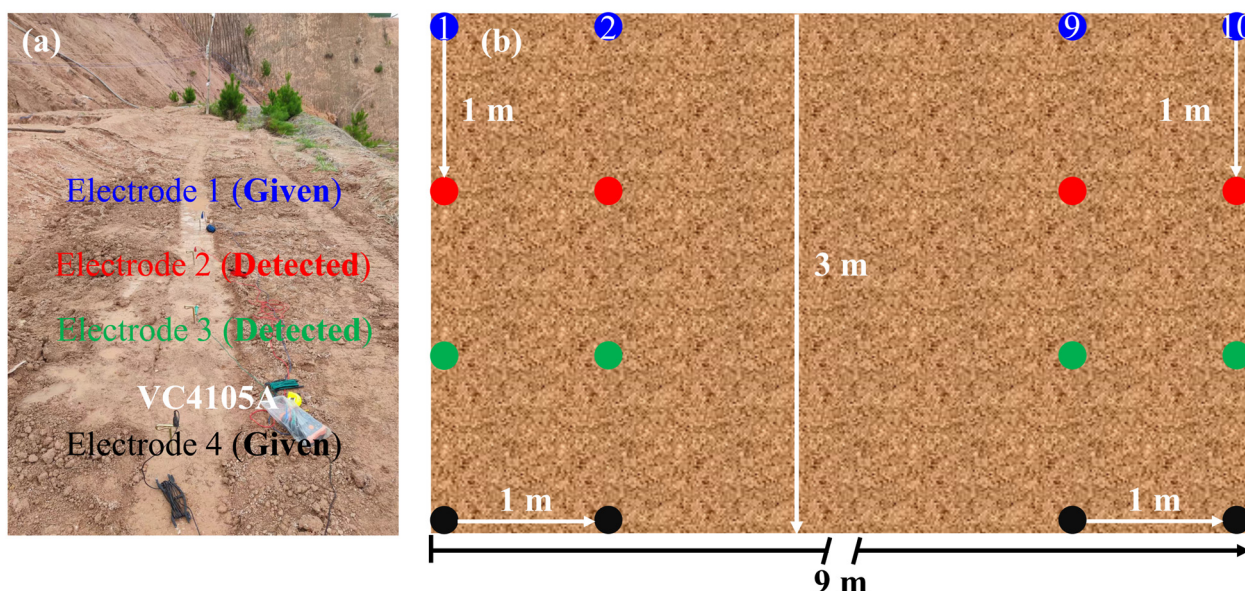

**Figure S1.** (a) The photo and (b) schematics showing the experimental method for measuring the soil conductivity that is used to predict the water content.

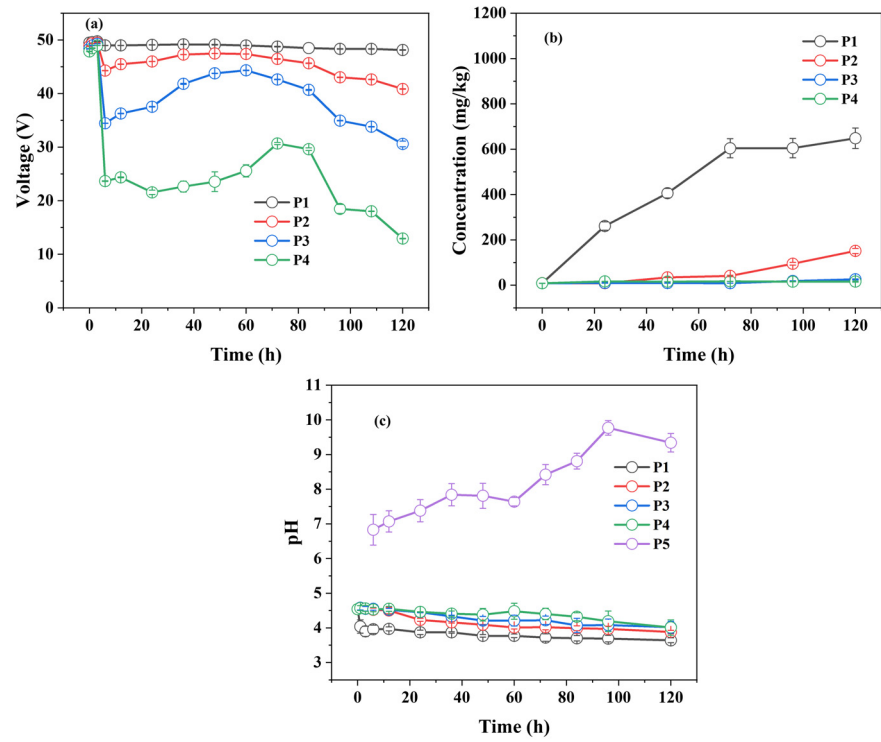

**Figure S2.** Variations of the moisture content (a), and concentration (b) and pH (c), respectively, at distinct position (P1-P5) in the simulated EKM experiment with the injection of 200 ppm  $\text{Sm}^{3+}$  solution.

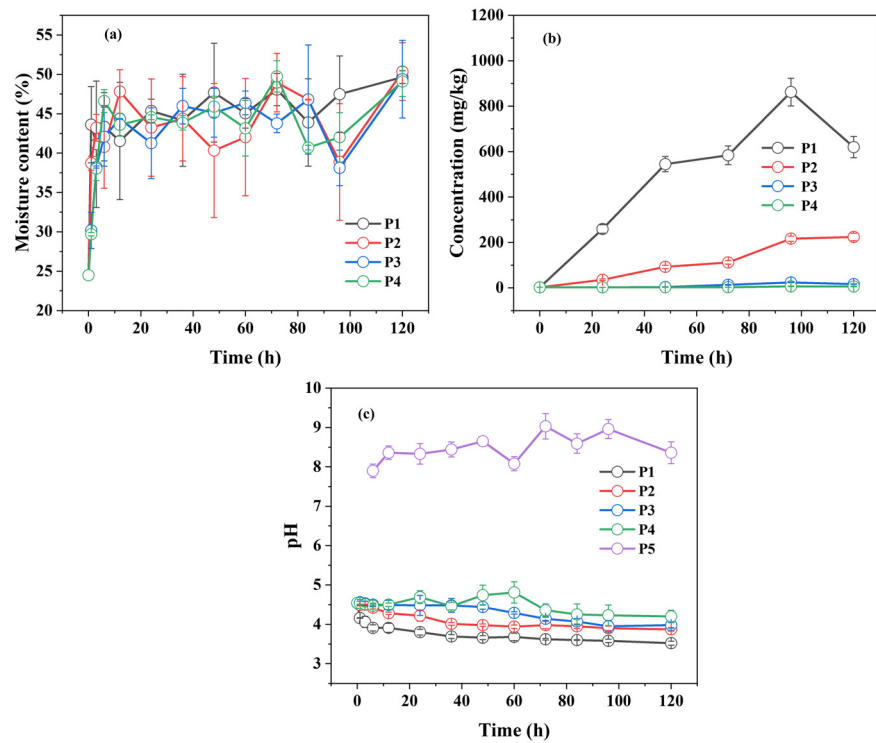

**Figure S3.** Variations of the moisture content (a), and concentration (b) and pH (c), respectively, at distinct position (P1-P5) in the simulated EKM experiment with the injection of 200 ppm  $\text{Er}^{3+}$  solution.

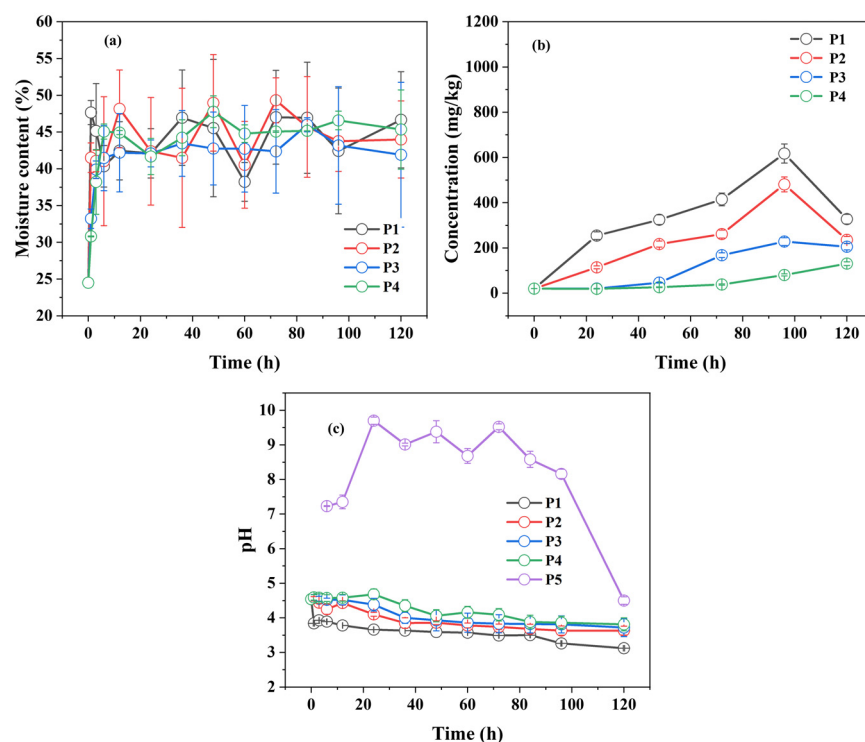

**Figure S4.** Variations of the moisture content (a), and concentration (b) and pH (c), respectively, at distinct position (P1-P5) in the simulated EKM experiment with the injection of 200 ppm  $Y^{3+}$  solution.

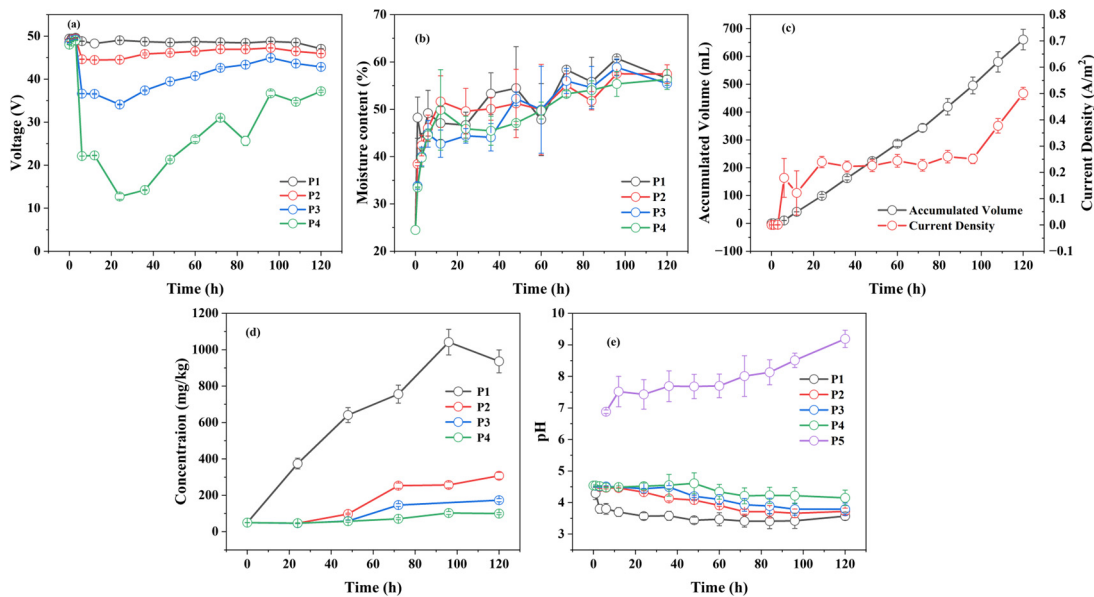

**Figure S5.** Variations of the voltage (a), moisture content (b), accumulative volume and current density (c), concentration (d) and pH (e), respectively, at distinct position (P1-P5) in the simulated EKM experiment with the injection of 400 ppm  $La^{3+}$  solution.

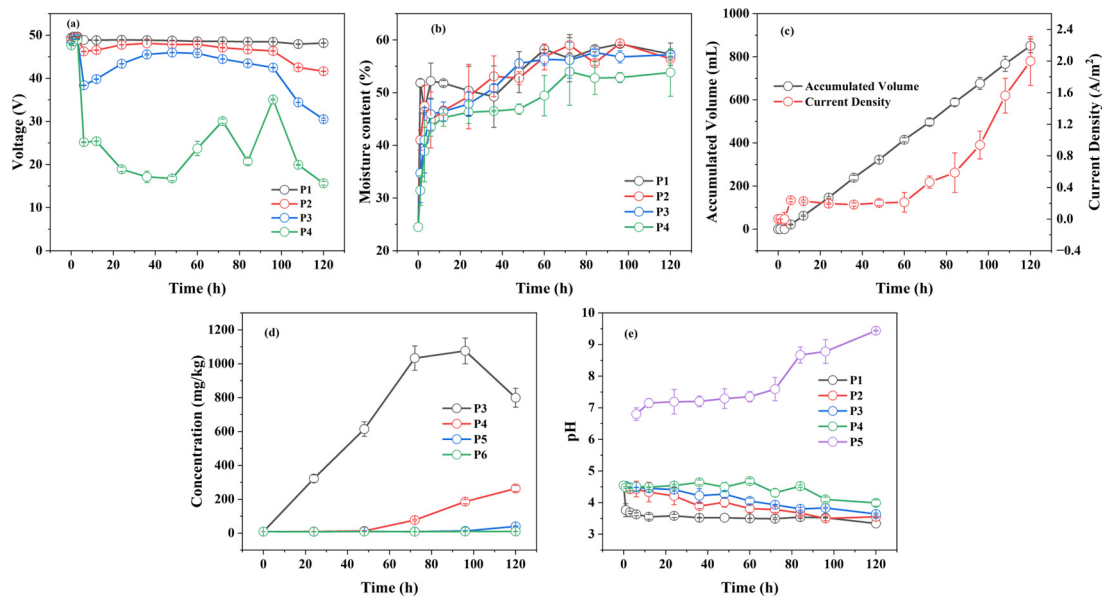

**Figure S6.** Variations of the voltage (a), moisture content (b), accumulative volume and current density (c), concentration (d) and pH (e), respectively, at distinct position (P1-P5) in the simulated EKM experiment with the injection of 400 ppm  $\text{Sm}^{3+}$  solution.

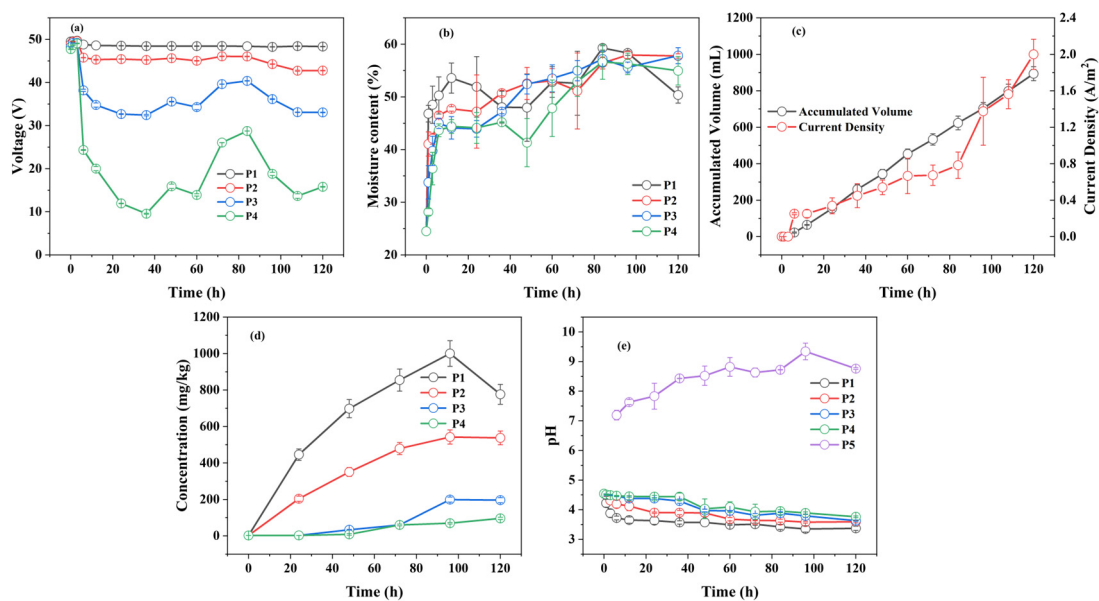

**Figure S7.** Variations of the voltage (a), moisture content (b), accumulative volume and current density (c), concentration (d) and pH (e), respectively, at distinct position (P1-P5) in the simulated EKM experiment with the injection of 400 ppm  $\text{Er}^{3+}$  solution.

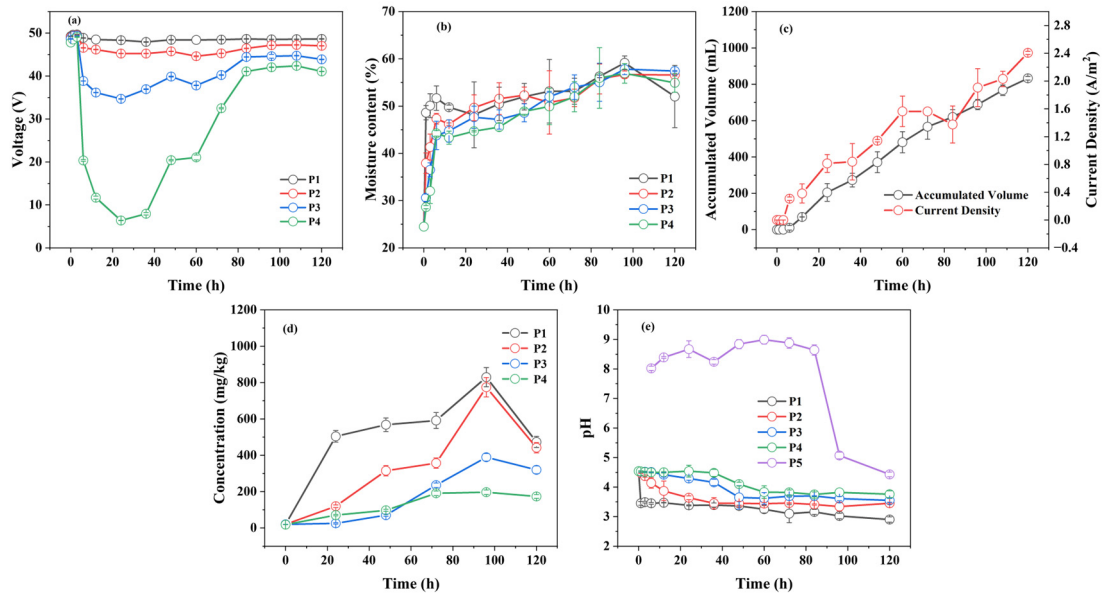

**Figure S8.** Variations of the voltage (a), moisture content (b), accumulative volume and current density (c), concentration (d) and pH (e), respectively, at distinct position (P1-P5) in the simulated EKM experiment with the injection of 400 ppm  $Y^{3+}$  solution.

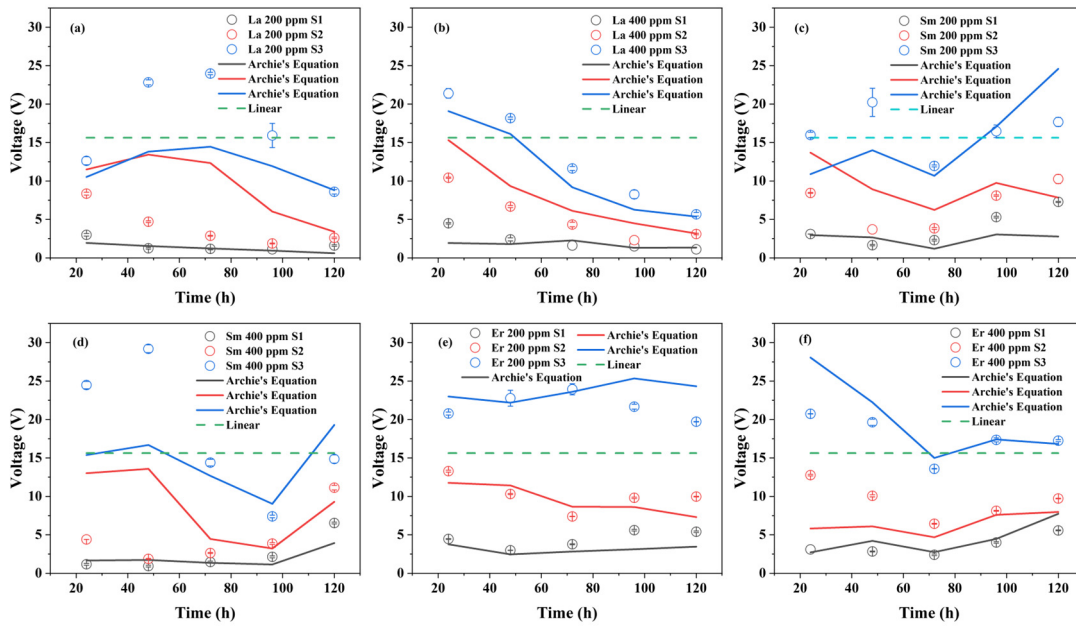

**Figure S9.** Variations of the voltage of S1, S2 and S3 with the injection of 200 and 400 ppm solution of  $La^{3+}$  (a, b),  $Sm^{3+}$  (c, d), and  $Er^{3+}$  (e, f), respectively.
